# Supplementary material for: Ion-cross-linked Hybrid Photochromic Hydrogels with Enhanced Mechanical Properties and Shape Memory Behaviour
Source: Preprints.org preprint supplement (doi:10.20944/preprints202402.1563.v1), 2024-02-27
Supplement: Supplementary file 1 [file supplementary]

**Supporting Information for**

**Ion-cross-linked Hybrid Photochromic Hydrogels with Enhanced Mechanical Properties and Shape Memory Behaviour**

Shijun Long1,2,3*, Fan Chen1, Han Ren1, Yali Hu1, Chao Chen4*, Yiwan Huang1,2 and Xuefeng Li1,2,3*

1 *Hubei Provincial Key* *Laboratory of Green Materials for Light Industry, Hubei University of Technology, Wuhan, 430068, PR China*

2 *Hubei Longzhong Laboratory, Xiangyang, 441000, PR China*

3 *New Materials and Green Manufacturing Talent Introduction and Innovation Demonstration Base, Hubei University of Technology, Wuhan, 430068, PR China*

4 *Hubei Key Laboratory of Polymer Materials, Hubei University, 430062, Wuhan, PR China*

*Corresponding author: longshijun.hp@163.com; chenchao@hubu.edu.cn; li_xf@mail.hbut.edu.cn





**Figure S1.** (a) The synthetic route of SPMA. (b) 1H NMR spectrum of SPMA monomer (solvent CDCl3, 400MHz).

**
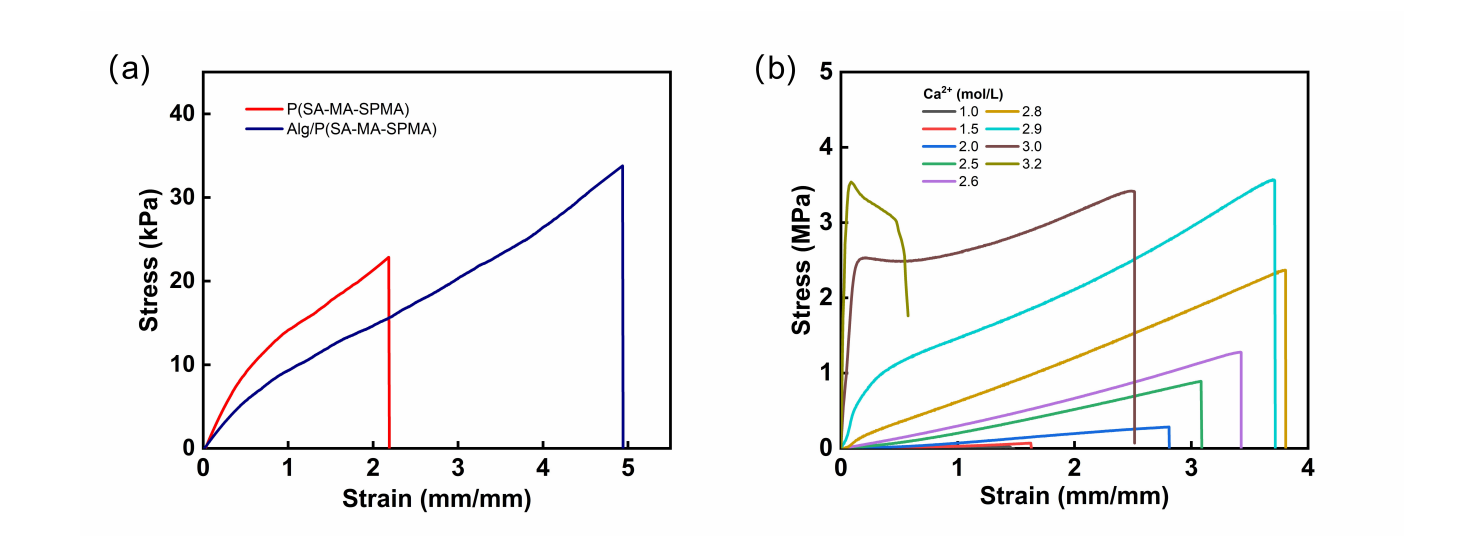
**

**Figure S2.** (a) Stress strain curve of P(SA-co-MA-co-SPMA) hydrogel and Alg/P(SA-co-MA-co-SPMA) hydrogel. (b) Stress strain curve of Alg/P(SA-co-MA-co-SPMA)/Ca2+ hydrogels soaked in solutions at different Ca2+ concentrations.


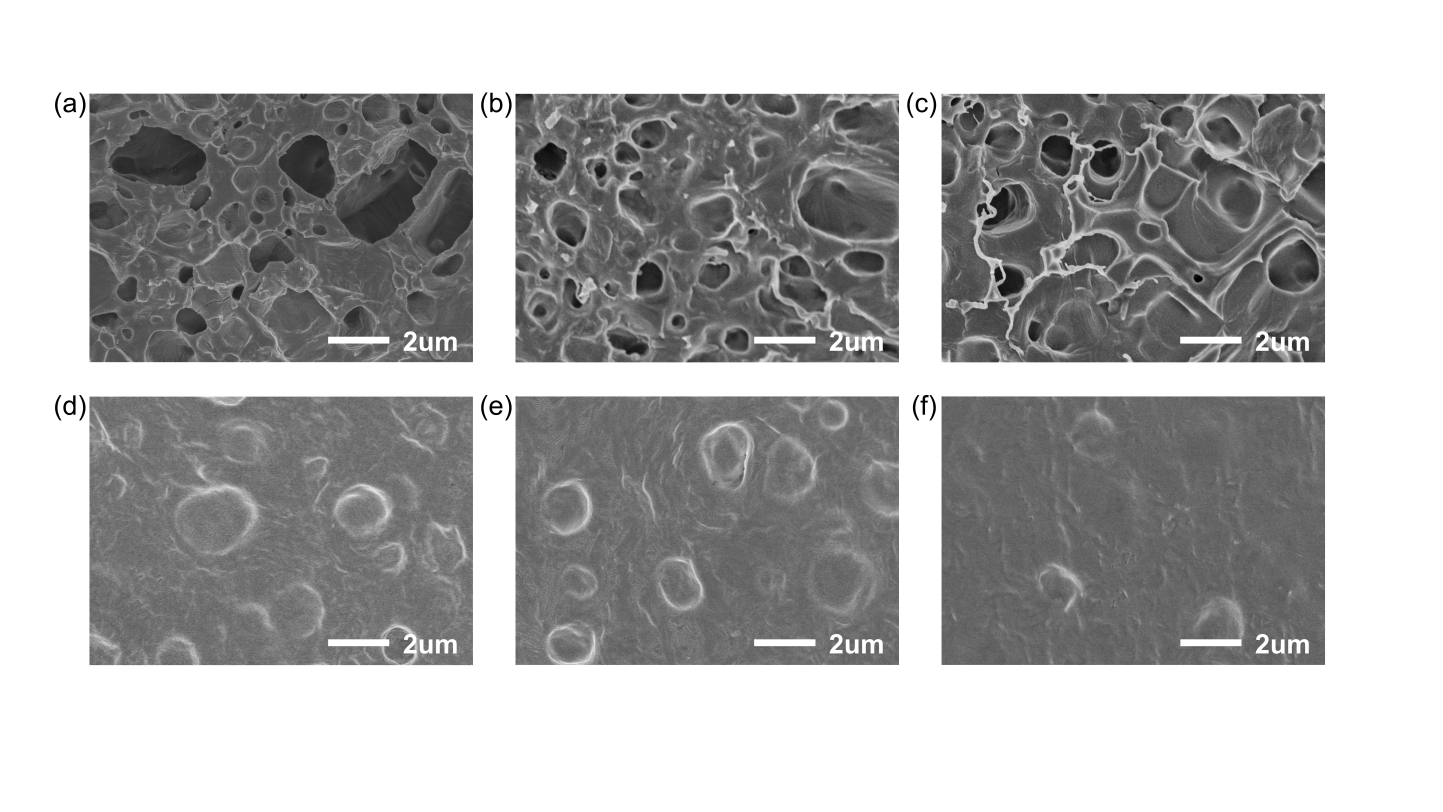


**Figure S3.** SEM images for cross-sectional morphology of hydrogels (scale bar = 2 µm). (a) P(SA-co-MA-co-SPMA) hydrogel. (b) Alg/P(SA-co-MA-co-SPMA) hydrogel. (c) Alg/P(SA-co-MA-co-SPMA)/Ca2+2.0M hydrogel. (d) Alg/P(SA-co-MA-co-SPMA)/Ca2+2.6M hydrogel. (e) Alg/P(SA-co-MA-co-SPMA)/Ca2+2.8M hydrogel. (f) Alg/P(SA-co-MA-co-SPMA)/Ca2+3.0M hydrogel.





**Figure S4.** Absorbance measurement of Alg/P(SA-co-MA-co-SPMA)/Ca2+2.8M hydrogel after different UV irradiation times.

**

**

**Figure S5.** Changes of An/A1 during repeated coloration/discolorization cycle of Alg/P(SA-co-MA-co-SPMA)/Ca2+2.8M hydrogel irradiated by alternative UV/vis light, where A1 and An represent the intensities for the first and nth cycles at the maximum absorption wavelength.

**
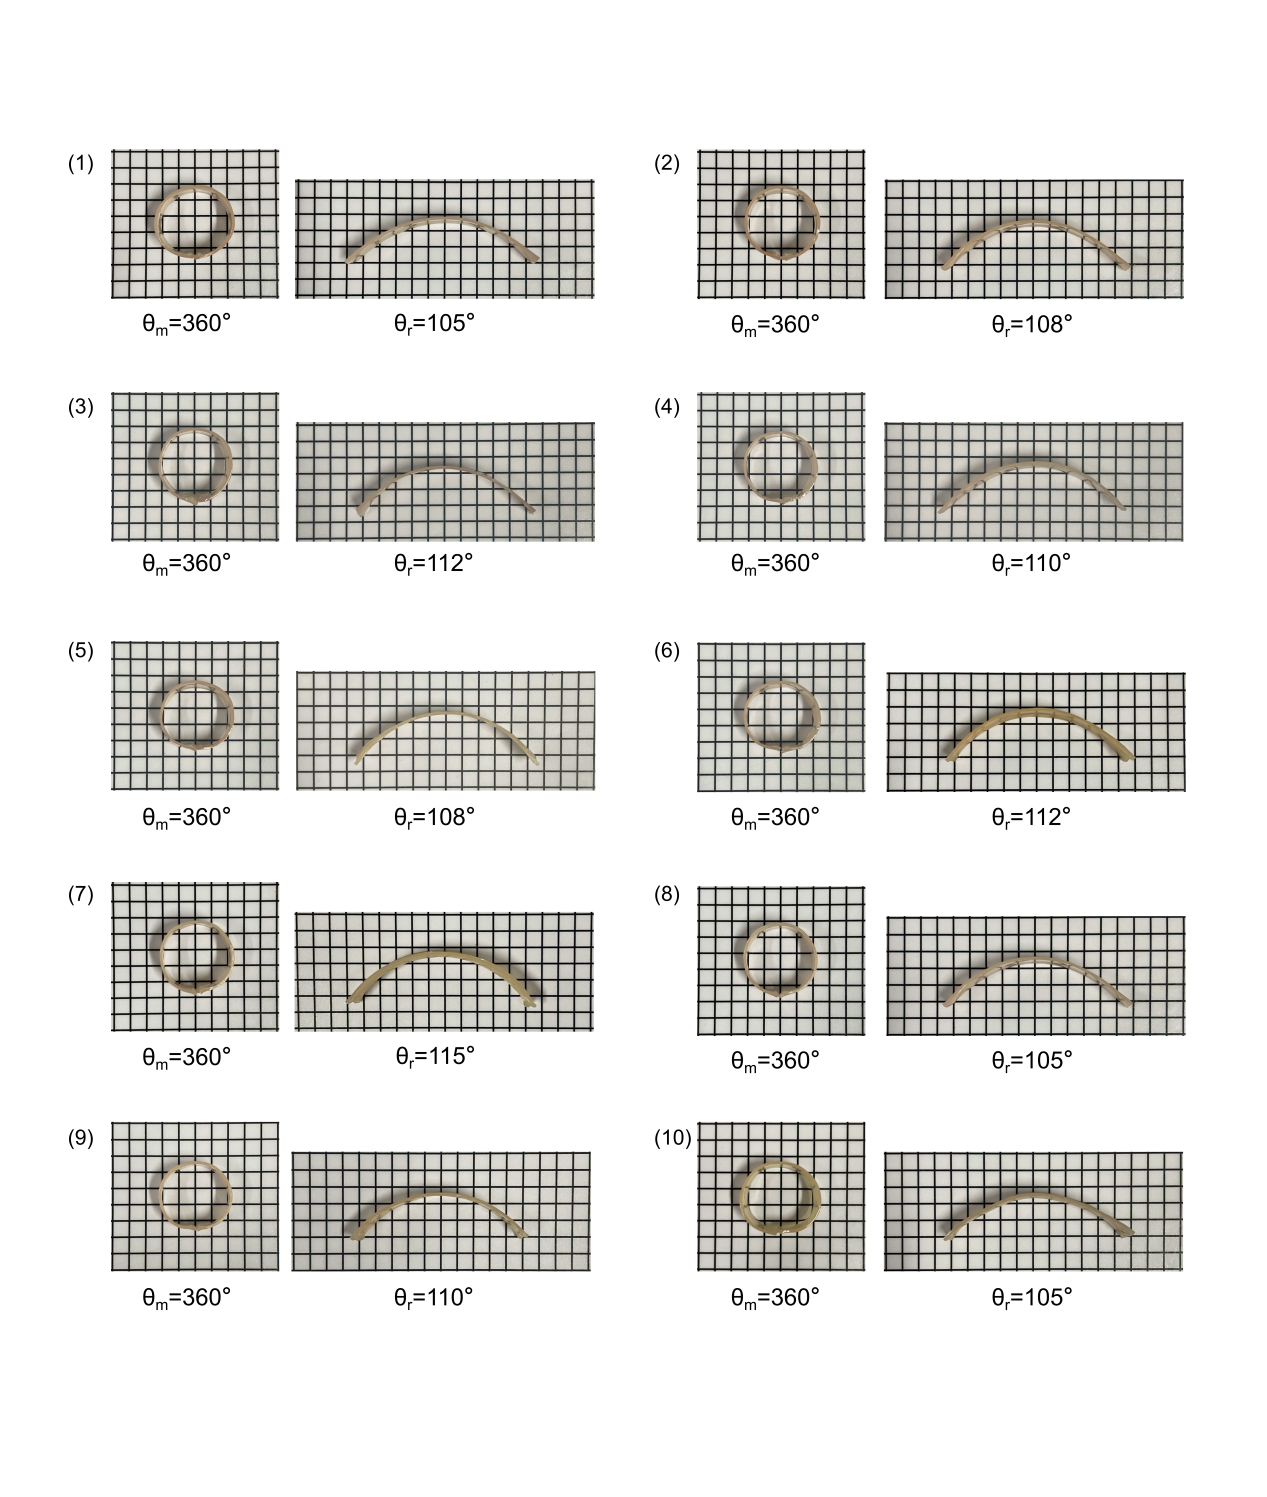
**

**Figure S6.** The photos of Alg/P(SA-co-MA-co-SPMA)/Ca2+2.8M hydrogel conducting 10 cycles of shape fixation and shape recovery.

**
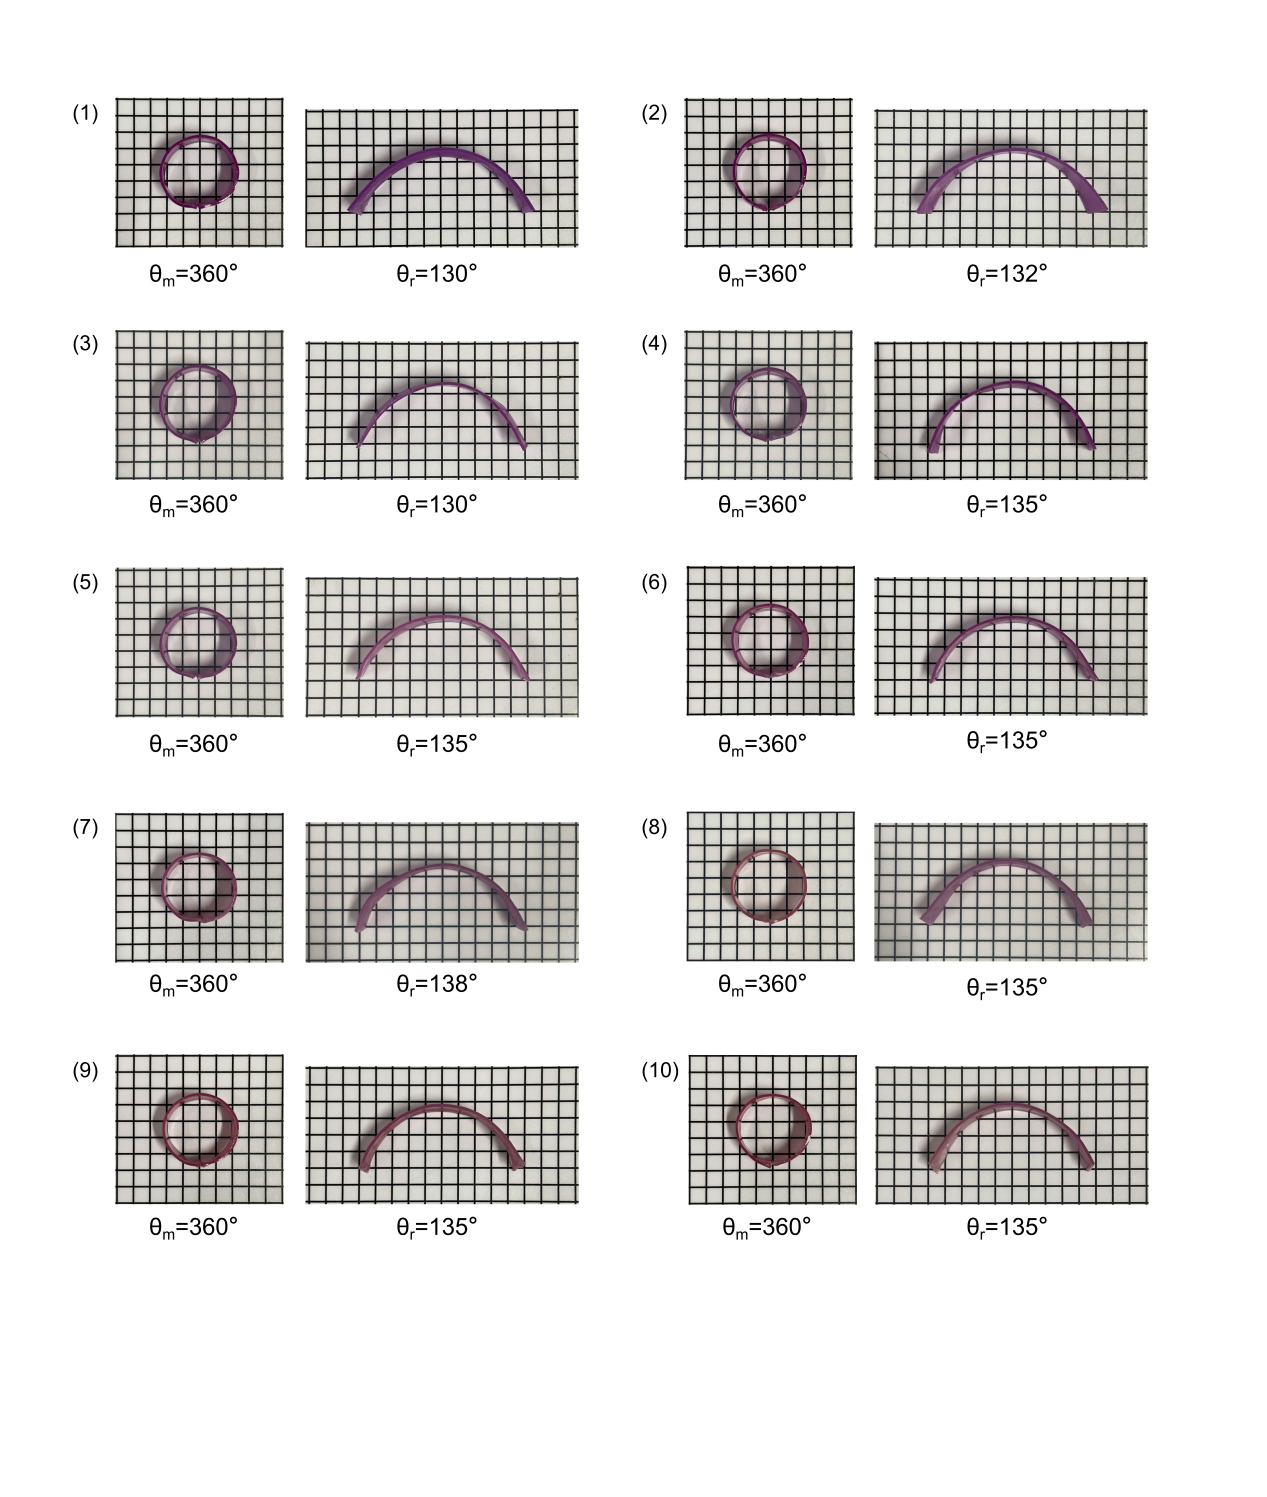
**

**Figure S7.** The photos of Alg/P(SA-co-MA-co-SPMA)/Ca2+2.8M hydrogel conducting 10 cycles of shape fixation and shape recovery under UV irradiation.
